# Supplementary material for: Flash drought characteristics based on three identification methods in the North China Plain, China
Source: Copernicus journal article supplement (doi:10.5194/hess-2024-185), 2024-07-05
Supplement: Supplementary file 1 [file hess-2024-185-supplement.pdf]

1 **Table S1 The main ranges of FD characteristics under different FD grades.**

| Characteristics              | Method             | FD1     | FD2     | FD3    | FD4    |
|------------------------------|--------------------|---------|---------|--------|--------|
| Duration <sub>Onset</sub>    | FD <sub>RZSM</sub> | 2~3.5   | 2~3.5   | 2~3.5  | 3~3.5  |
|                              | FD <sub>SESR</sub> | 2~4     | 2~5     | 3~6    | 3~6    |
|                              | FD <sub>MESR</sub> | 2~3     | 2~4     | 3~4    | 3~5    |
| Duration <sub>Recovery</sub> | FD <sub>RZSM</sub> | 3~11    | 1~5     | 1~3    | 1~3    |
|                              | FD <sub>SESR</sub> | 4~7     | 2~5     | 1~4    | 1~4    |
|                              | FD <sub>MESR</sub> | 4~6     | 2~6     | 2~6    | 2~6    |
| Duration <sub>Total</sub>    | FD <sub>RZSM</sub> | 6~12    | 4~8     | 4~6    | 4~6    |
|                              | FD <sub>SESR</sub> | 7~10    | 6~8     | 6~8    | 6~8    |
|                              | FD <sub>MESR</sub> | 6~10    | 6~10    | 6~10   | 6~10   |
| Severity                     | FD <sub>RZSM</sub> | 150~350 | 50~150  | 0~100  | 0~50   |
|                              | FD <sub>SESR</sub> | 100~150 | 150~300 | 50~100 | 50~100 |
|                              | FD <sub>MESR</sub> | 50~200  | 50~200  | 50~200 | 50~200 |

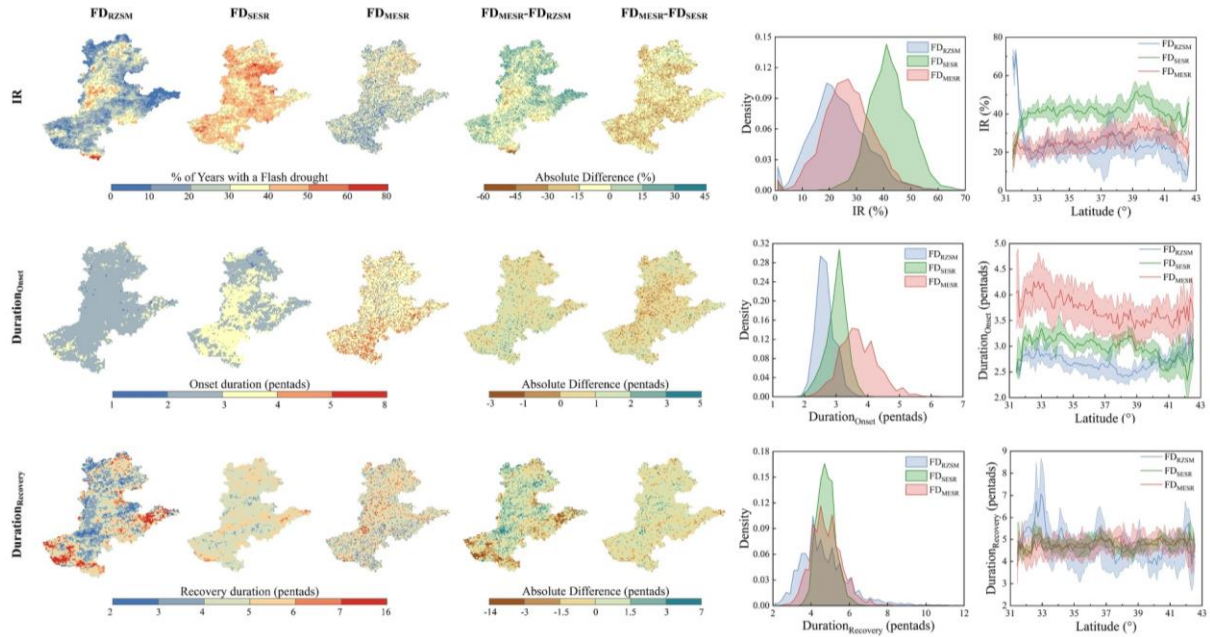

2 **Figure S1 Same as Figure 4, but for IR, duration<sub>Onset</sub> and duration<sub>Recovery</sub>.**

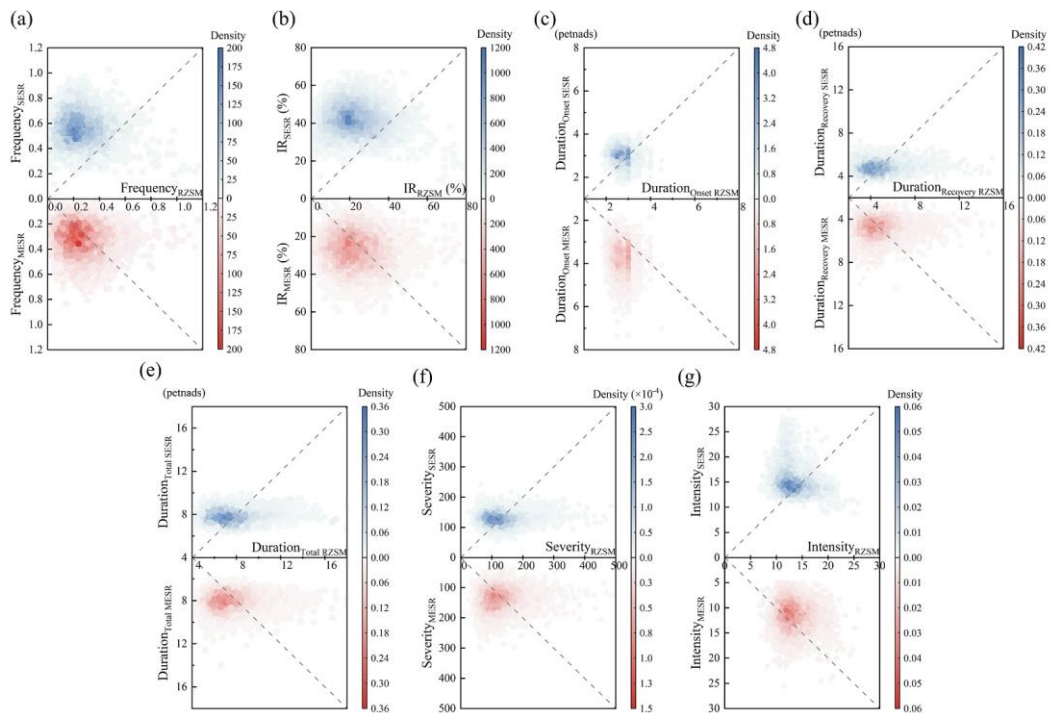

3 **Figure S2 Scatter densities of FD characteristics identified by RZSM, SESR, and MESR.**

4  
5

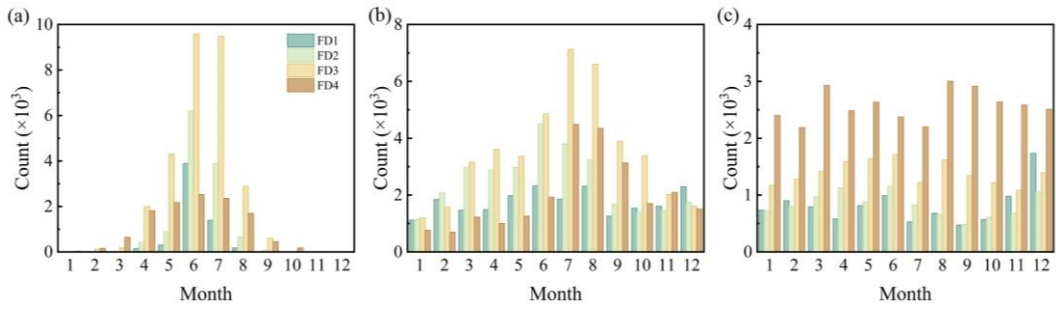

6

7

Figure S3 The amount of FD grids under different (a)  $FD_{RZSM}$ , (b)  $FD_{SER}$  and (c)  $FD_{MESR}$  grades from 1981 to 2022.

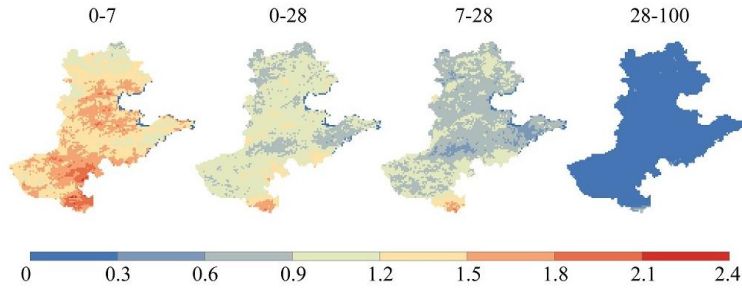

8

9

Figure S4 Frequency for  $FD_{RZSM}$  with RZSM from different soil layers.

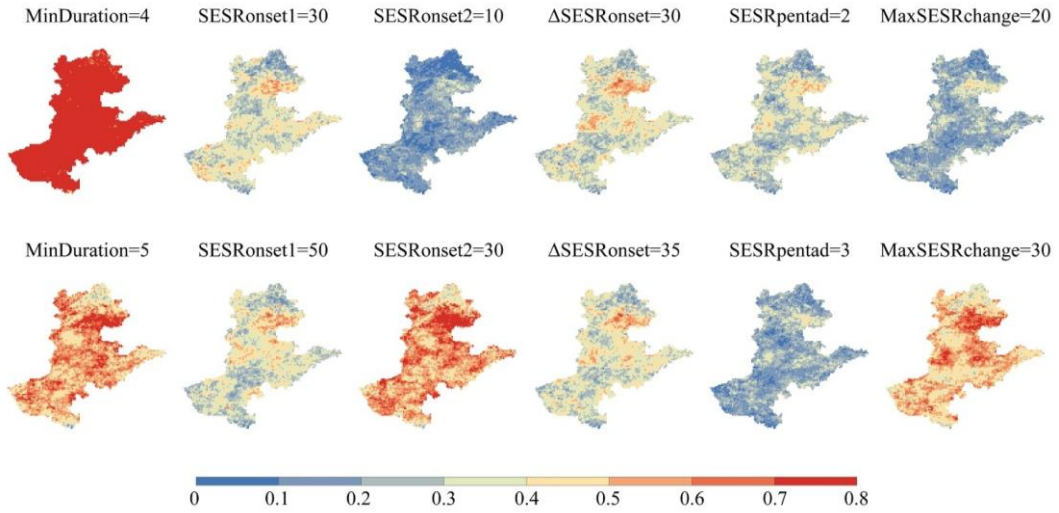

10

11

Figure S5 Same as Figure 11, but for  $FD_{SER}$ .

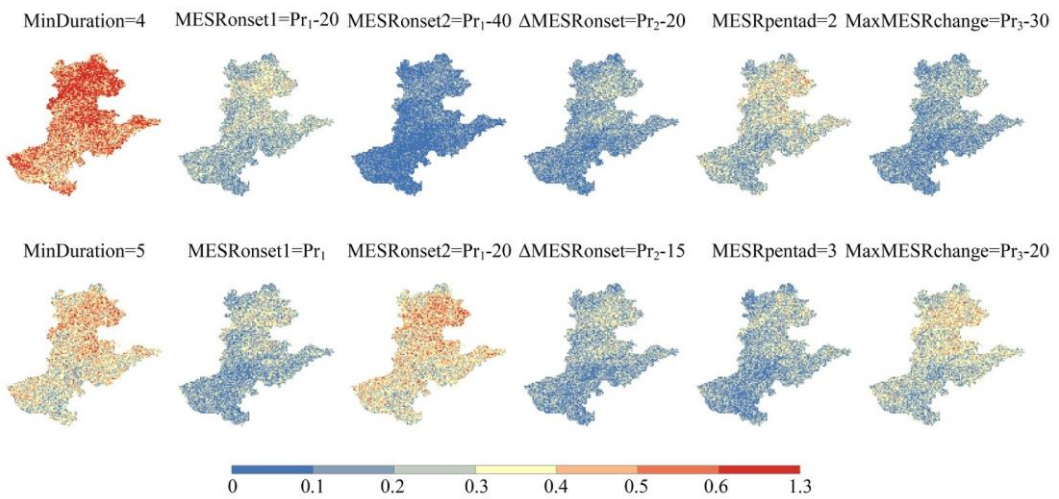

12

13

Figure S6 Same as Figure 11, but for  $FD_{MESR}$ .

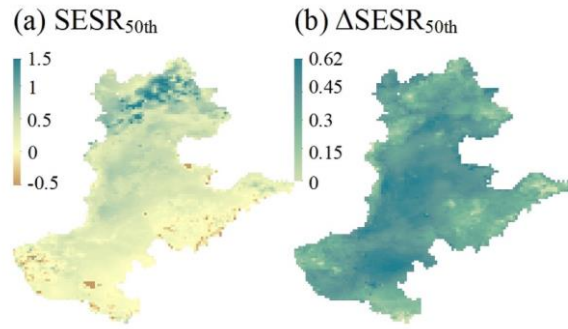

14

15

**Figure S7 Distribution of the mean (a)  $SESR_{50th}$  and (b)  $\Delta SESR_{50th}$ .**

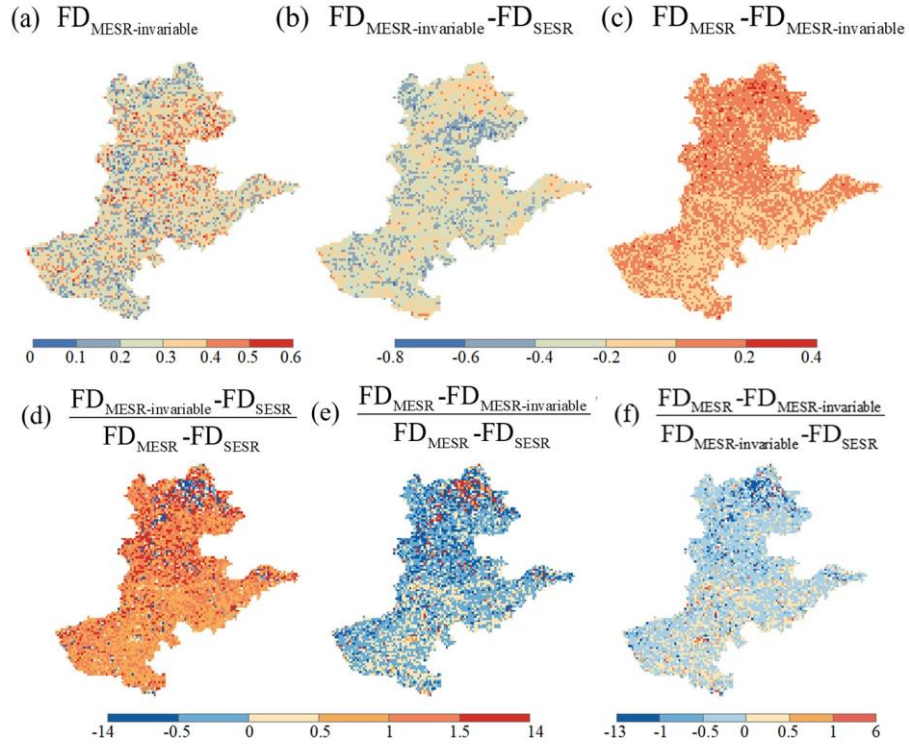

16

17

**Figure S8 Frequency of  $FD_{MESR-invariable}$  and its difference with  $FD_{MESR}$  and  $FD_{SESR}$ .**
